# Supplementary material for: Green synthesis of fluorescent Schiff bases: chemo-photophysical characterization, X-ray structures, and their bioimaging
Source: Royal Society of Chemistry journal article supplement (doi:10.1039/d1nj02875h), 2021-01-01
Supplement: d1nj02875h1.pdf [file d1nj02875h1.pdf]

## Electronic Supporting Information for:

### Green synthesis of fluorescent Schiff bases: Chemo-photophysical characterization, X-ray structures, and their bioimaging

Leonardo Xochicale-Santana,<sup>[a]</sup> Margarita López-Espejel,<sup>[a]</sup> Víctor M. Jiménez-Pérez,<sup>[a]\*</sup> Jesús Lara-Cerón,<sup>[a]</sup> Alberto Gómez-Treviño,<sup>[a]</sup> Noemí Waksman,<sup>[b]</sup> H. V. Rasika Dias,<sup>[c]</sup> and Blanca M. Muñoz-Flores.<sup>[a] \*</sup>

[a] Facultad de Ciencias Químicas, Universidad Autónoma de Nuevo León, Pedro de Alba s/n, C. P. 66451, Nuevo León, México.

[b] Universidad Autónoma de Nuevo León, Facultad de Medicina, Av. Dr. Eduardo Aguirre Pequeño, 64460, Nuevo León, México.

[c] Department of Chemistry and Biochemistry, The University of Texas at Arlington, Arlington, Texas 76019-0065.

\*Corresponding author: Tel +52(81)83294000; Fax: 52 (81)83760570.

E-mail addresses: [bmunflo@uanl.edu.mx](mailto:bmunflo@uanl.edu.mx) (B. M. Muñoz-Flores)  
[victor.jimenezpr@uanl.edu.mx](mailto:victor.jimenezpr@uanl.edu.mx)

#### Table of contents

|                                                             |    |
|-------------------------------------------------------------|----|
| <b>1. Experimental section</b> .....                        | 2  |
| 1.1 General remarks .....                                   | 2  |
| 1.2 Synthesis of Schiff bases <b>1-2</b> .....              | 2  |
| 1.3 Crystal structure analysis .....                        | 3  |
| 1.4 NMR spectra of <sup>1</sup> H and <sup>13</sup> C ..... | 13 |

## 1. Experimental section

### 1.1 General remarks

The reagents were procured from Aldrich Chemical Company. Solvents were used without further purification. The syntheses were performed in ultrasonic bath Branson 2510R-DTH with 40 kHz of frequency. Retsch MM200 mixer mill at 25 Hz was used for the ball-milling experiments with a 20 mL stainless-steel vessel and 10 mm stainless balls. UV spectra were obtained with a Shimadzu 2401 PC UV/VIS spectrophotometer and emission spectra were performed on a Fluorolog-3 fluorescence spectrometer. Melting points were confirmed by Electrothermal Mel-Temp apparatus.  $^1\text{H}$  NMR (400.00 MHz) and  $^{13}\text{C}$  (100.00 MHz) spectra were recorded using equipment Bruker advance DPX 400. All NMR spectra were performed in dimethyl sulfoxide deuterated ( $\text{DMSO}-d_6$ ) as solvent. The  $^1\text{H}$  and  $^{13}\text{C}$  NMR shifts are referenced concerning  $(\text{CH}_3)_4\text{Si}$ . Chemical shifts are given parts per million (ppm) downfield from the reference, and all coupling constants ( $J$ ) are reported in Hertz (Hz). High-resolution mass spectra were acquired by LC/MSD TOF on an Agilent Technologies instrument with APCI as chemical ionization in positive mode. Mass spectra were recorded on an AB Sciex API 2000<sup>TM</sup> LC/MS/MS System.

### 1.2 Synthesis of Schiff bases 1-2

#### *Conventional heating*

A mixture of de 4-aminobenzoic acid (2.0 mmol) and *p*-substituted aldehyde (2.0 mmol) in methanol was heating for 4 hours. After the solvent was evaporated in vacuum obtaining a colored solid as a product, solids were filtered and washed with cold methanol and hexane. Compounds **1** and **2** crystallized from  $\text{MeOH}-\text{CHCl}_3$  (3:7) by slow evaporation.

#### *Ultrasound*

A mixture of de 4-aminobenzoic acid (2.0 mmol) and *p*-substituted aldehyde (2.0 mmol) in methanol was irradiated in an ultrasonic bath at 40 kHz for 30 min afforded a precipitated, which was washer and filtered with cool ethanol. For the solvent-free reaction, the reagents are mixed in a flask and subsequently irradiated with an ultrasound bath.

#### *Mechanochemical*

A mixture of de 4-aminobenzoic acid (2.0 mmol) and *p*-substituted aldehyde (2.0 mmol) was placed in a 20 ml stainless-steel vessel and 10 mm stainless balls. The vial

was placed in a vibrational ball mill and subjected to milling for 30 min with a 25 Hz frequency. The resulting powder was precipitated in MeOH/CHCl<sub>3</sub>. For the synthesis of compound **2**, a Teflon seal was placed between the vessel and the top closure of the stainless-steel vessel. Solids are recrystallized in AcOEt and washed with cold methanol and hexane.

### 1.3 Crystal structure analysis

A suitable crystal covered with a layer of hydrocarbon/Paratone-N oil was selected and mounted on a Cryo-loop, and immediately placed in the low temperature nitrogen stream. The X-ray intensity data of **2** were measured at 100(2) K, on a Bruker SMART APEX II CCD area detector system whereas **1** were measured at 100(2) K, on a Bruker D8 Quest with a Photon 100 CMOS detector. These instruments are equipped with an Oxford Cryosystems 700 series cooler, a graphite monochromator, and a Mo K $\alpha$  fine-focus sealed tube ( $\lambda = 0.71073$  Å). Intensity data were processed using the Bruker Apex program suite. Absorption corrections were applied using SADABS. Initial atomic positions were located by direct methods using XS or XT, and the structures of the compounds were refined by the least-squares method using SHELXL<sup>1-2</sup> within Olex2<sup>3</sup> GUI. All the non-hydrogen atoms were refined anisotropically. Hydrogen atoms were included at calculated positions and refined riding on corresponding carbons. There are two molecules of **1** in the asymmetric unit. The core atoms of one of these molecules shows positional disorder over two sites, which was resolved satisfactorily. CCDC 2084947-2084948 files contain the supplementary crystallographic data. These data can be obtained free of charge via <http://www.ccdc.cam.ac.uk/conts/retrieving.html> or from the Cambridge Crystallographic Data Centre (CCDC), 12 Union Road, Cambridge, CB2 1EZ, UK).

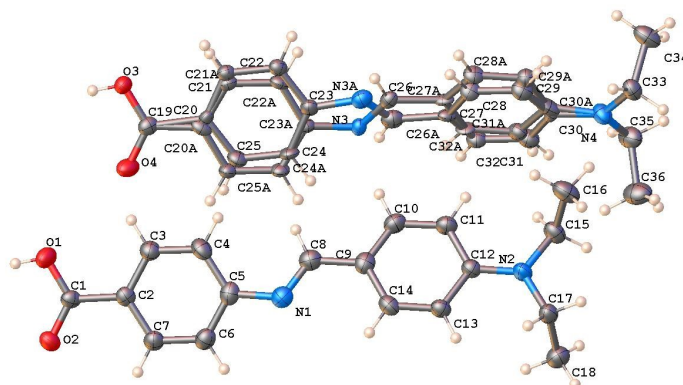

Figure S1. Structure of compound **2**.

Table S1. Crystal data and structure refinement for **1**.

|                                             |                                                               |
|---------------------------------------------|---------------------------------------------------------------|
| Empirical formula                           | C <sub>18</sub> H <sub>20</sub> N <sub>2</sub> O <sub>2</sub> |
| Formula weight                              | 296.36                                                        |
| Temperature/K                               | 99.99                                                         |
| Crystal system                              | triclinic                                                     |
| Space group                                 | P-1                                                           |
| a/Å                                         | 8.0487(7)                                                     |
| b/Å                                         | 14.0919(12)                                                   |
| c/Å                                         | 15.0169(13)                                                   |
| α/°                                         | 111.429(2)                                                    |
| β/°                                         | 101.274(3)                                                    |
| γ/°                                         | 94.147(3)                                                     |
| Volume/Å <sup>3</sup>                       | 1535.5(2)                                                     |
| Z                                           | 4                                                             |
| ρ <sub>calc</sub> /g/cm <sup>3</sup>        | 1.282                                                         |
| μ/mm <sup>-1</sup>                          | 0.084                                                         |
| F(000)                                      | 632.0                                                         |
| Crystal size/mm <sup>3</sup>                | 0.31 × 0.3 × 0.15                                             |
| Radiation                                   | MoKα (λ = 0.71073)                                            |
| 2Θ range for data collection/°              | 6.002 to 52.742                                               |
| Index ranges                                | -10 ≤ h ≤ 10, -17 ≤ k ≤ 17, -18 ≤ l ≤ 18                      |
| Reflections collected                       | 15564                                                         |
| Independent reflections                     | 6253 [R <sub>int</sub> = 0.0206, R <sub>sigma</sub> = 0.0255] |
| Data/restraints/parameters                  | 6253/11/481                                                   |
| Goodness-of-fit on F <sup>2</sup>           | 1.042                                                         |
| Final R indexes [I ≥ 2σ (I)]                | R <sub>1</sub> = 0.0526, wR <sub>2</sub> = 0.1365             |
| Final R indexes [all data]                  | R <sub>1</sub> = 0.0596, wR <sub>2</sub> = 0.1434             |
| Largest diff. peak/hole / e Å <sup>-3</sup> | 0.67/-0.34                                                    |

Table S2. Bond Lengths for 1.

| Atom Atom Length/Å |     |            | Atom Atom Length/Å |      |          |
|--------------------|-----|------------|--------------------|------|----------|
| O1                 | C1  | 1.2864(19) | N4                 | C35  | 1.458(2) |
| O2                 | C1  | 1.2641(18) | C19                | C20  | 1.551(3) |
| N1                 | C5  | 1.419(2)   | C19                | C20A | 1.425(3) |
| N1                 | C8  | 1.268(2)   | C20                | C25  | 1.3900   |
| N2                 | C12 | 1.369(2)   | C20                | C21  | 1.3900   |
| N2                 | C15 | 1.460(2)   | C25                | C24  | 1.3900   |
| N2                 | C17 | 1.461(2)   | C24                | C23  | 1.3900   |
| C1                 | C2  | 1.471(2)   | C23                | C22  | 1.3900   |
| C2                 | C3  | 1.393(2)   | C22                | C21  | 1.3900   |
| C2                 | C7  | 1.395(2)   | C20A               | C25A | 1.3900   |
| C3                 | C4  | 1.388(2)   | C20A               | C21A | 1.3900   |
| C4                 | C5  | 1.399(2)   | C25A               | C24A | 1.3900   |
| C5                 | C6  | 1.387(2)   | C24A               | C23A | 1.3900   |
| C6                 | C7  | 1.380(2)   | C23A               | C22A | 1.3900   |
| C8                 | C9  | 1.460(2)   | C22A               | C21A | 1.3900   |
| C9                 | C10 | 1.388(2)   | C26                | C27A | 1.465(3) |
| C9                 | C14 | 1.402(2)   | C26A               | C27  | 1.467(3) |
| C10                | C11 | 1.373(2)   | C27                | C28  | 1.3900   |
| C11                | C12 | 1.414(2)   | C27                | C32  | 1.3900   |
| C12                | C13 | 1.415(2)   | C28                | C29  | 1.3900   |
| C13                | C14 | 1.376(2)   | C29                | C30  | 1.3900   |

| Atom Atom Length/Å |      |            | Atom Atom Length/Å |      |          |
|--------------------|------|------------|--------------------|------|----------|
| C15                | C16  | 1.513(3)   | C30                | C31  | 1.3900   |
| C17                | C18  | 1.513(2)   | C31                | C32  | 1.3900   |
| O3                 | C19  | 1.2852(18) | C27A               | C28A | 1.3900   |
| O4                 | C19  | 1.2609(19) | C27A               | C32A | 1.3900   |
| N3                 | C23A | 1.417(2)   | C28A               | C29A | 1.3900   |
| N3                 | C26  | 1.283(3)   | C29A               | C30A | 1.3900   |
| N3A                | C23  | 1.424(3)   | C30A               | C31A | 1.3900   |
| N3A                | C26A | 1.272(3)   | C31A               | C32A | 1.3900   |
| N4                 | C30  | 1.350(3)   | C33                | C34  | 1.514(2) |
| N4                 | C30A | 1.461(3)   | C35                | C36  | 1.519(3) |
| N4                 | C33  | 1.456(2)   |                    |      |          |

Table S3. Bond Lengths for 1.

| Atom Atom Atom Angle/° |    |     |            | Atom Atom Atom Angle/° |     |     |          |
|------------------------|----|-----|------------|------------------------|-----|-----|----------|
| C8                     | N1 | C5  | 119.52(15) | C25                    | C20 | C21 | 120.0    |
| C12                    | N2 | C15 | 121.96(13) | C21                    | C20 | C19 | 121.4(3) |
| C12                    | N2 | C17 | 121.92(13) | C20                    | C25 | C24 | 120.0    |
| C15                    | N2 | C17 | 116.00(13) | C23                    | C24 | C25 | 120.0    |
| O1                     | C1 | C2  | 117.68(13) | C24                    | C23 | N3A | 123.9(3) |
| O2                     | C1 | O1  | 122.63(14) | C24                    | C23 | C22 | 120.0    |
| O2                     | C1 | C2  | 119.69(13) | C22                    | C23 | N3A | 116.1(3) |
| C3                     | C2 | C1  | 120.97(14) | C21                    | C22 | C23 | 120.0    |

**Atom Atom Atom Angle/°**

C3 C2 C7 119.30(14)

C7 C2 C1 119.72(13)

C4 C3 C2 119.98(15)

C3 C4 C5 120.62(15)

C4 C5 N1 125.96(15)

C6 C5 N1 115.19(15)

C6 C5 C4 118.85(15)

C7 C6 C5 120.79(15)

C6 C7 C2 120.42(15)

N1 C8 C9 121.47(15)

C10 C9 C8 119.77(15)

C10 C9 C14 117.50(15)

C14 C9 C8 122.65(15)

C11 C10 C9 121.99(15)

C10 C11 C12 120.93(14)

N2 C12 C11 121.71(13)

N2 C12 C13 121.20(13)

C11 C12 C13 117.08(14)

C14 C13 C12 120.80(14)

C13 C14 C9 121.66(14)

N2 C15 C16 112.47(14)

N2 C17 C18 112.42(14)

**Atom Atom Atom Angle/°**

C22 C21 C20 120.0

C25A C20A C19 120.5(3)

C25A C20A C21A 120.0

C21A C20A C19 119.0(3)

C20A C25A C24A 120.0

C25A C24A C23A 120.0

C24A C23A N3 116.7(2)

C22A C23A N3 123.1(2)

C22A C23A C24A 120.0

C21A C22A C23A 120.0

C22A C21A C20A 120.0

N3 C26 C27A 124.2(3)

N3A C26A C27 122.9(3)

C28 C27 C26A 123.0(3)

C28 C27 C32 120.0

C32 C27 C26A 117.0(3)

C27 C28 C29 120.0

C30 C29 C28 120.0

N4 C30 C29 121.9(3)

N4 C30 C31 118.1(3)

C29 C30 C31 120.0

C32 C31 C30 120.0

**Atom Atom Atom Angle/°**

C26 N3 C23A 122.3(3)

C26A N3A C23 118.8(3)

C30 N4 C33 125.7(2)

C30 N4 C35 118.7(2)

C33 N4 C30A 119.1(2)

C33 N4 C35 115.55(13)

C35 N4 C30A 124.6(2)

O3 C19 C20 113.2(2)

O3 C19 C20A 122.2(2)

O4 C19 O3 123.04(14)

O4 C19 C20 123.7(2)

O4 C19 C20A 114.8(2)

C25 C20 C19 118.6(3)

**Atom Atom Atom Angle/°**

C31 C32 C27 120.0

C28A C27A C26 120.1(3)

C28A C27A C32A 120.0

C32A C27A C26 119.7(3)

C29A C28A C27A 120.0

C30A C29A C28A 120.0

C29A C30A N4 119.3(3)

C29A C30A C31A 120.0

C31A C30A N4 120.4(3)

C32A C31A C30A 120.0

C31A C32A C27A 120.0

N4 C33 C34 112.59(13)

N4 C35 C36 112.66(15)



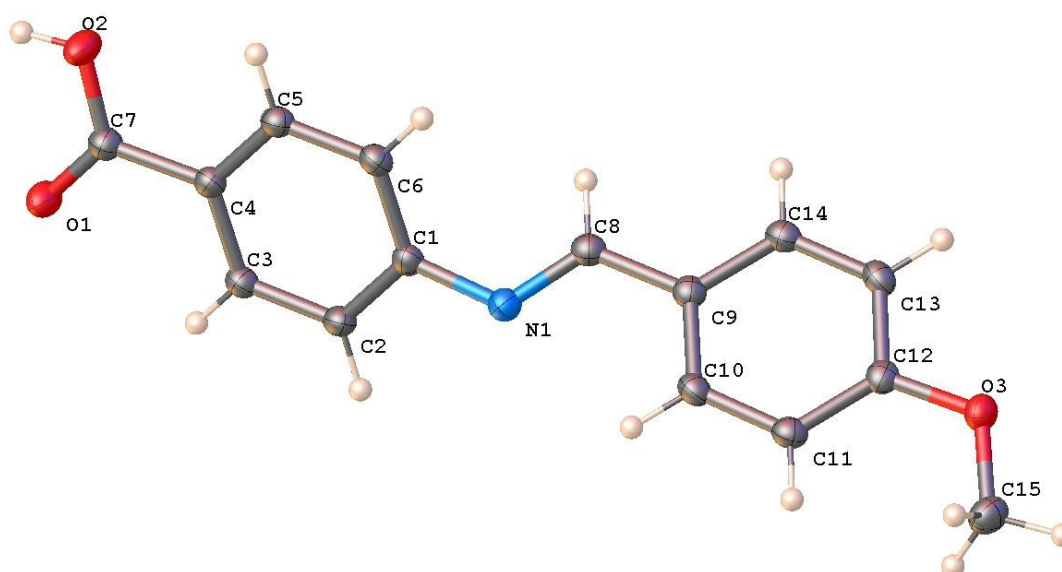

**Figure S2.** Structure of compound **2**.

**Table S4.** Crystal data and structure refinement for **1**.

|                       |                                                 |
|-----------------------|-------------------------------------------------|
| Empirical formula     | C <sub>15</sub> H <sub>13</sub> NO <sub>3</sub> |
| Formula weight        | 255.26                                          |
| Temperature/K         | 100.15                                          |
| Crystal system        | monoclinic                                      |
| Space group           | P2 <sub>1</sub> /c                              |
| a/Å                   | 3.8262(6)                                       |
| b/Å                   | 15.078(2)                                       |
| c/Å                   | 21.190(3)                                       |
| $\alpha$ /°           | 90                                              |
| $\beta$ /°            | 92.423(2)                                       |
| $\gamma$ /°           | 90                                              |
| Volume/Å <sup>3</sup> | 1221.4(3)                                       |
| Z                     | 4                                               |

|                                                                |                                                               |
|----------------------------------------------------------------|---------------------------------------------------------------|
| $\rho_{\text{calc}}/\text{cm}^3$                               | 1.388                                                         |
| $\mu/\text{mm}^{-1}$                                           | 0.097                                                         |
| F(000)                                                         | 536.0                                                         |
| Crystal size/ $\text{mm}^3$                                    | $0.25 \times 0.2 \times 0.1$                                  |
| Radiation                                                      | MoK $\alpha$ ( $\lambda = 0.71073$ )                          |
| 2 $\Theta$ range for data collection/ $^\circ$ 3.316 to 56.622 |                                                               |
| Index ranges                                                   | $-5 \leq h \leq 5, -19 \leq k \leq 20, -27 \leq l \leq 28$    |
| Reflections collected                                          | 11643                                                         |
| Independent reflections                                        | 3025 [ $R_{\text{int}} = 0.0228, R_{\text{sigma}} = 0.0174$ ] |
| Data/restraints/parameters                                     | 3025/0/174                                                    |
| Goodness-of-fit on $F^2$                                       | 1.050                                                         |
| Final R indexes [ $I \geq 2\sigma(I)$ ]                        | $R_1 = 0.0438, wR_2 = 0.1197$                                 |
| Final R indexes [all data]                                     | $R_1 = 0.0478, wR_2 = 0.1250$                                 |
| Largest diff. peak/hole / $e \text{ \AA}^{-3}$ 0.42/-0.21      |                                                               |

**Table S5.** Crystal data and structure refinement for **1**.

| Atom Atom Length/ $\text{\AA}$ |     |            | Atom Atom Length/ $\text{\AA}$ |     |            |
|--------------------------------|-----|------------|--------------------------------|-----|------------|
| O1                             | C7  | 1.2399(14) | C4                             | C5  | 1.3969(15) |
| O2                             | C7  | 1.3098(14) | C4                             | C7  | 1.4762(15) |
| O3                             | C12 | 1.3708(13) | C5                             | C6  | 1.3872(15) |
| O3                             | C15 | 1.4306(14) | C8                             | C9  | 1.4665(15) |
| N1                             | C1  | 1.4085(14) | C9                             | C10 | 1.3979(15) |
| N1                             | C8  | 1.2765(15) | C9                             | C14 | 1.4006(15) |

| Atom Atom Length/Å |    |            | Atom Atom Length/Å |     |            |
|--------------------|----|------------|--------------------|-----|------------|
| C1                 | C2 | 1.4004(15) | C10                | C11 | 1.3858(15) |
| C1                 | C6 | 1.4009(15) | C11                | C12 | 1.3961(15) |
| C2                 | C3 | 1.3841(15) | C12                | C13 | 1.3956(15) |
| C3                 | C4 | 1.3973(15) | C13                | C14 | 1.3831(15) |

**Table S6.** Crystal data and structure refinement for **1**.

| Atom Atom Atom Angle/° |    |     |            | Atom Atom Atom Angle/° |     |     |            |
|------------------------|----|-----|------------|------------------------|-----|-----|------------|
| C12                    | O3 | C15 | 117.20(9)  | O1                     | C7  | C4  | 121.52(10) |
| C8                     | N1 | C1  | 119.80(9)  | O2                     | C7  | C4  | 115.71(9)  |
| C2                     | C1 | N1  | 117.95(9)  | N1                     | C8  | C9  | 121.28(10) |
| C2                     | C1 | C6  | 119.75(10) | C10                    | C9  | C8  | 120.61(10) |
| C6                     | C1 | N1  | 122.17(10) | C10                    | C9  | C14 | 118.50(10) |
| C3                     | C2 | C1  | 119.85(10) | C14                    | C9  | C8  | 120.87(10) |
| C2                     | C3 | C4  | 120.49(10) | C11                    | C10 | C9  | 121.38(10) |
| C3                     | C4 | C7  | 118.61(9)  | C10                    | C11 | C12 | 119.18(10) |
| C5                     | C4 | C3  | 119.71(10) | O3                     | C12 | C11 | 124.14(10) |
| C5                     | C4 | C7  | 121.68(10) | O3                     | C12 | C13 | 115.57(10) |
| C6                     | C5 | C4  | 120.08(10) | C13                    | C12 | C11 | 120.28(10) |
| C5                     | C6 | C1  | 120.11(10) | C14                    | C13 | C12 | 119.86(10) |
| O1                     | C7 | O2  | 122.77(10) | C13                    | C14 | C9  | 120.78(10) |

# 1.4 NMR spectra of $^1\text{H}$ and $^{13}\text{C}$ .

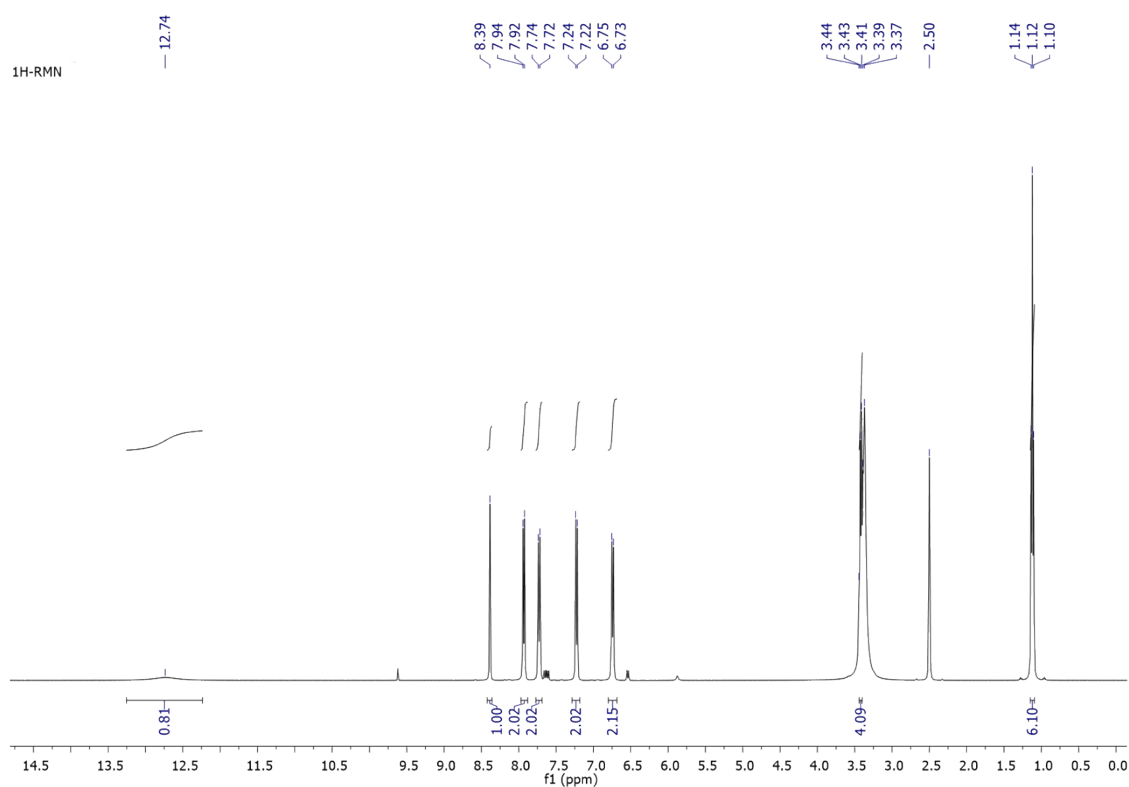

**Figure S3.**  $^1\text{H}$  NMR spectrum for compound **1** in  $\text{DMSO-}d_6$ .

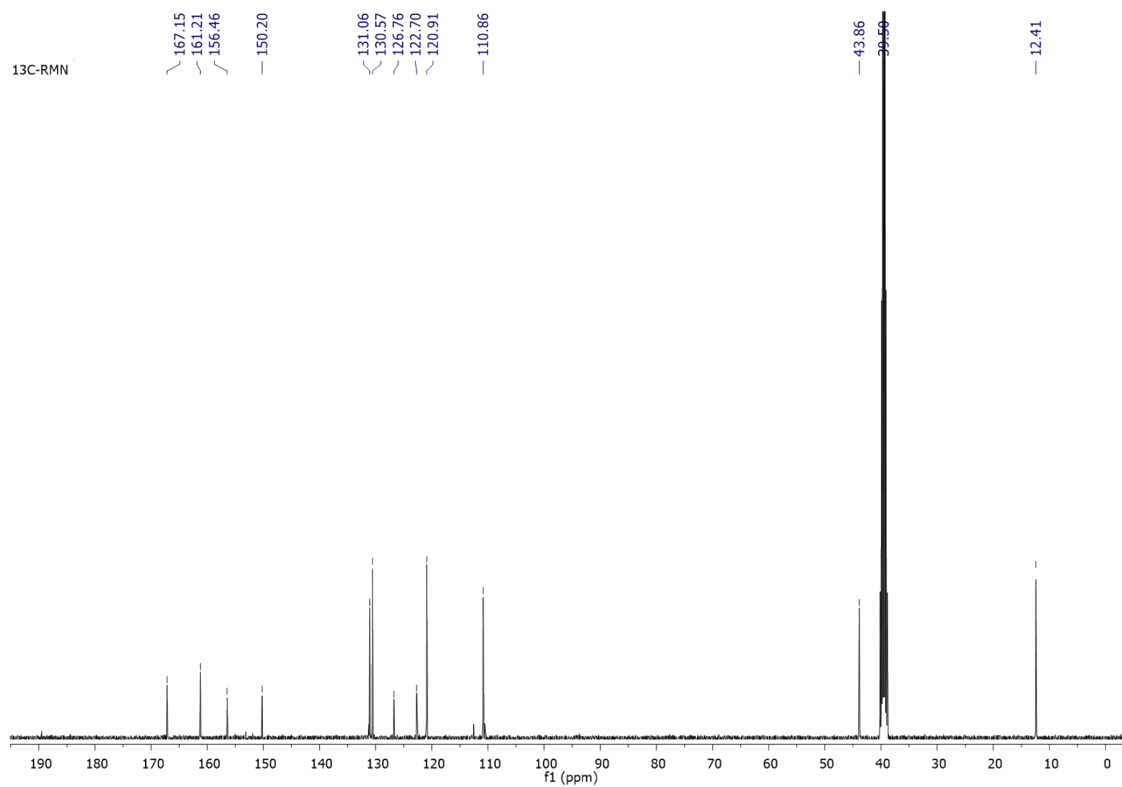

**Figure S4.**  $^{13}\text{C}$  NMR spectrum for compound **1** in  $\text{DMSO-}d_6$ .

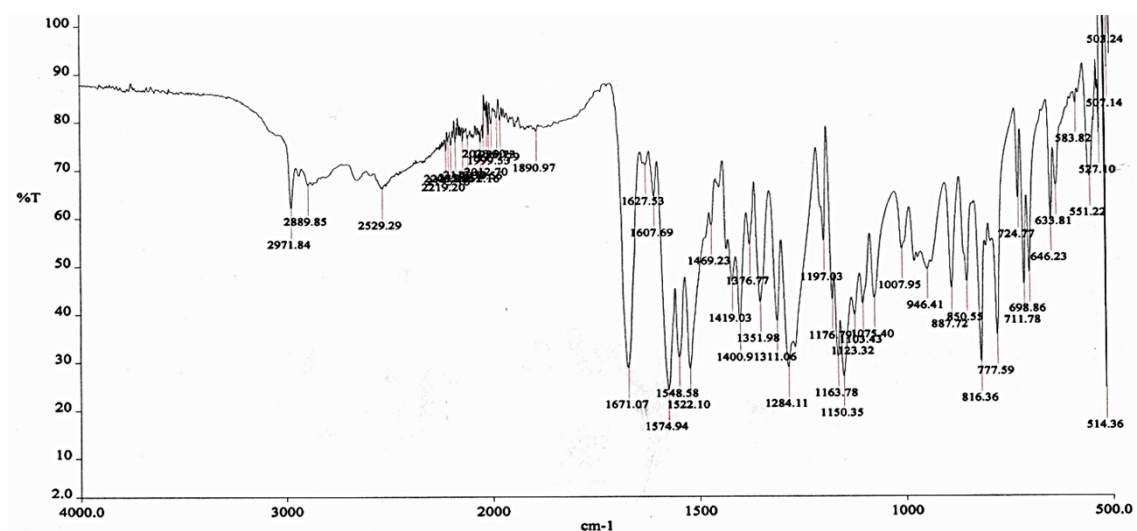

Figure S5. IR spectrum for compound 1.

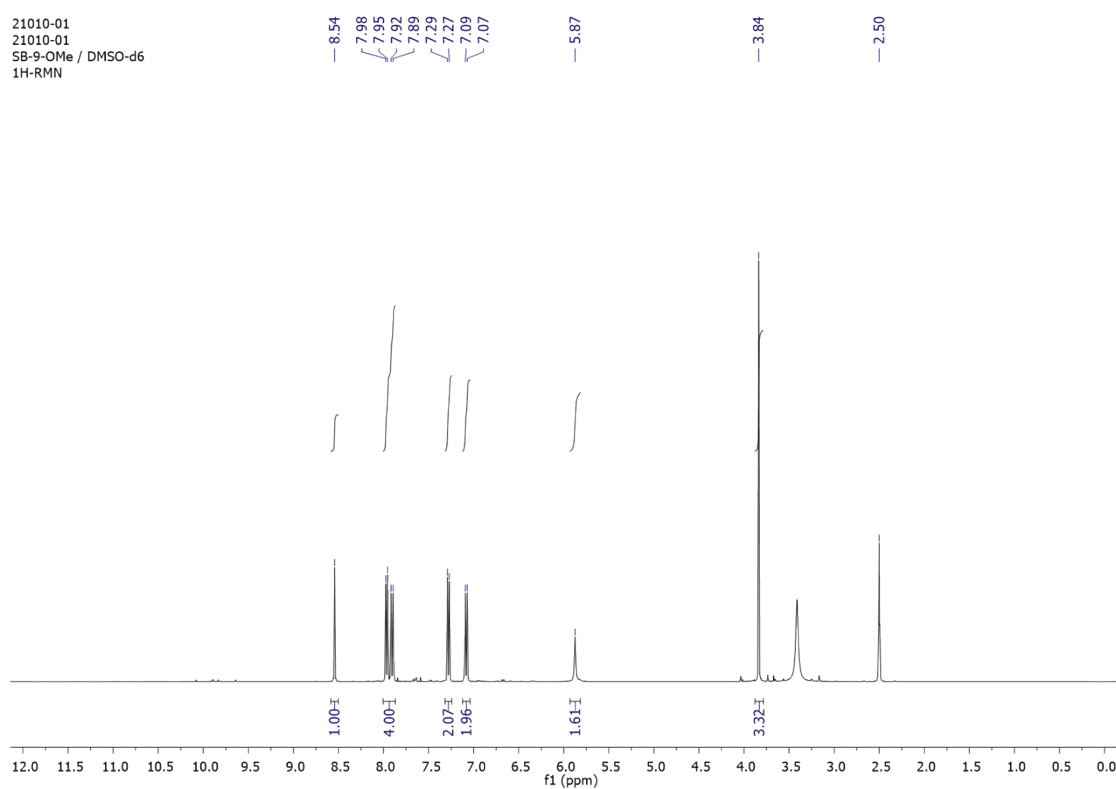

Figure S6. <sup>1</sup>H NMR spectrum for compound 2 in DMSO-*d*<sub>6</sub>.

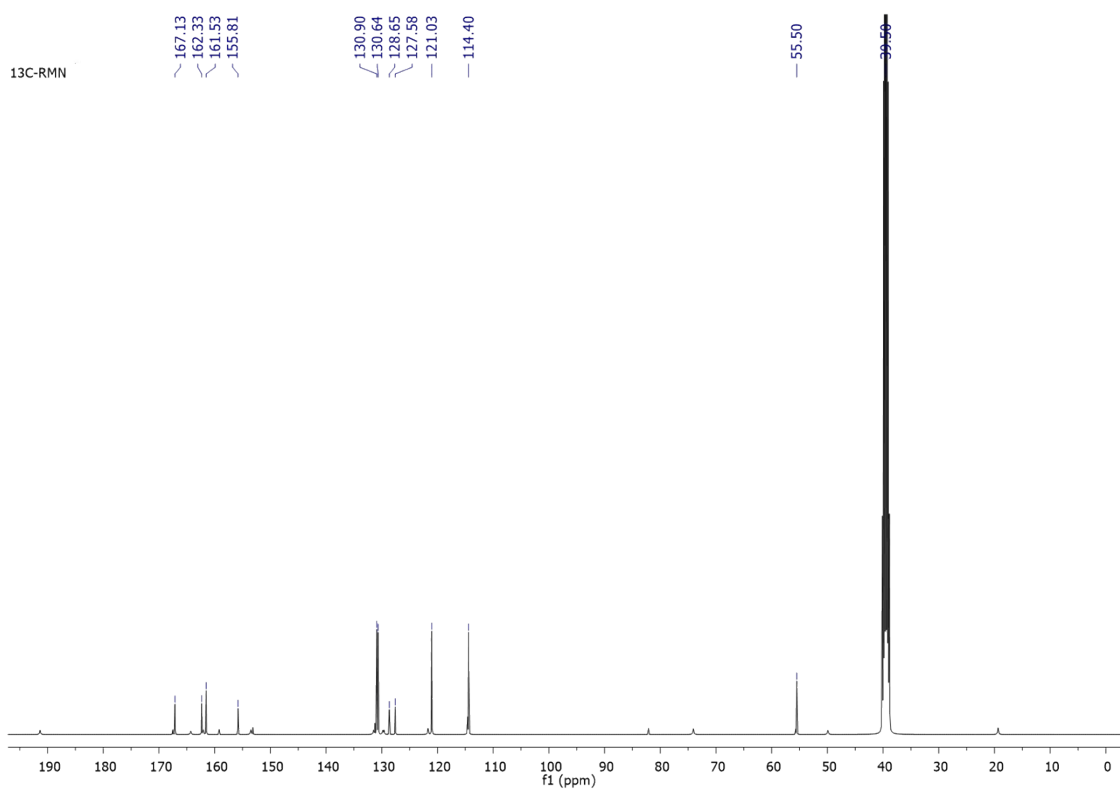

**Figure S7.**  $^1\text{H}$  NMR spectrum for compound **2** in  $\text{DMSO-}d_6$ .

*1.5 UV absorption and emission spectra of **1** and **2**.*

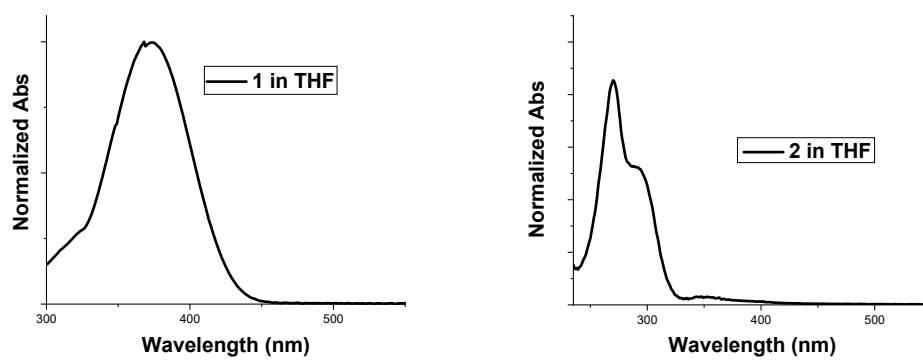

**Figure S8.** Absorption spectra of **1** (left) and **2** (right) in THF.

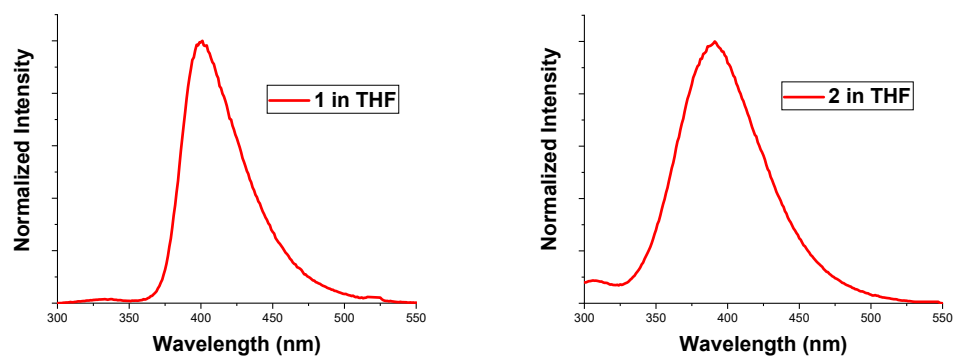

**Figure S9.** Emission spectra of **1** (left) and **2** (right) in THF.

**Table S7.** Pictures in solid state of compound **2** under day and UV (365 nm) light.

| light              | Conventional<br>Heating                                                             | US-dry                                                                              | US-Methanol                                                                          | MC                                                                                    |
|--------------------|-------------------------------------------------------------------------------------|-------------------------------------------------------------------------------------|--------------------------------------------------------------------------------------|---------------------------------------------------------------------------------------|
| Day light          |   |   |   |   |
| UV light<br>365 nm |  |  |  |  |
